# Supplementary material
Source: bioRxiv or medRxiv preprint supplement (https://medrxiv.org/highwire/filestream/95217/field_highwire_adjunct_files/0/2020.08.31.20185363-1.pdf)
Supplement: Supplementary file [file 2020.08.31.20185363-1.pdf]

## SUPPLEMENTARY MATERIAL

**FIGURE S1: Cumulative incidence of mortality and overall outcomes by site of admission.** Error bands are one standard deviation above and below the central estimate. The table shows the final dispositions of all patients in the study population at the end of the study, by site of admission.

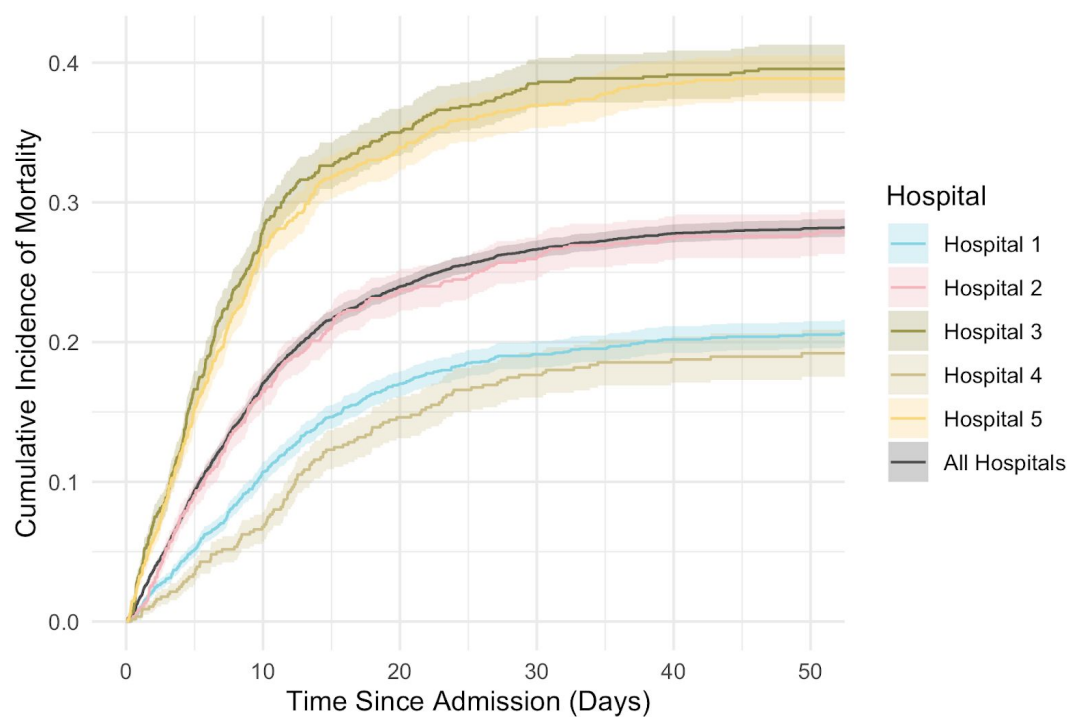

| Hospital   | Expired     | Discharge Home/Eloped | Discharge to Facility | Censored  | Total |
|------------|-------------|-----------------------|-----------------------|-----------|-------|
| Hospital 1 | 363 (20.6%) | 1118 (63.4%)          | 239 (13.6%)           | 42 (2.4%) | 1762  |
| Hospital 2 | 228 (27.8%) | 373 (45.4%)           | 210 (25.6%)           | 10 (1.2%) | 821   |
| Hospital 3 | 316 (39.5%) | 314 (39.3%)           | 161 (20.1%)           | 9 (1.1%)  | 800   |
| Hospital 4 | 107 (19.1%) | 338 (60.2%)           | 105 (18.7%)           | 11 (2.0%) | 561   |
| Hospital 5 | 348 (38.8%) | 329 (36.7%)           | 202 (22.6%)           | 17 (1.9%) | 896   |

**FIGURE S2: Examples of variables leading to satisfactory cumulative incidence splits.** The following variables led to good separation by cumulative incidence of mortality, and all were considered for the final score.

(a) Oxygen delivery: 0 = room air, 1 = low-flow, 2 = high-flow, 3 = CPAP/BiPAP, 4 = IMV

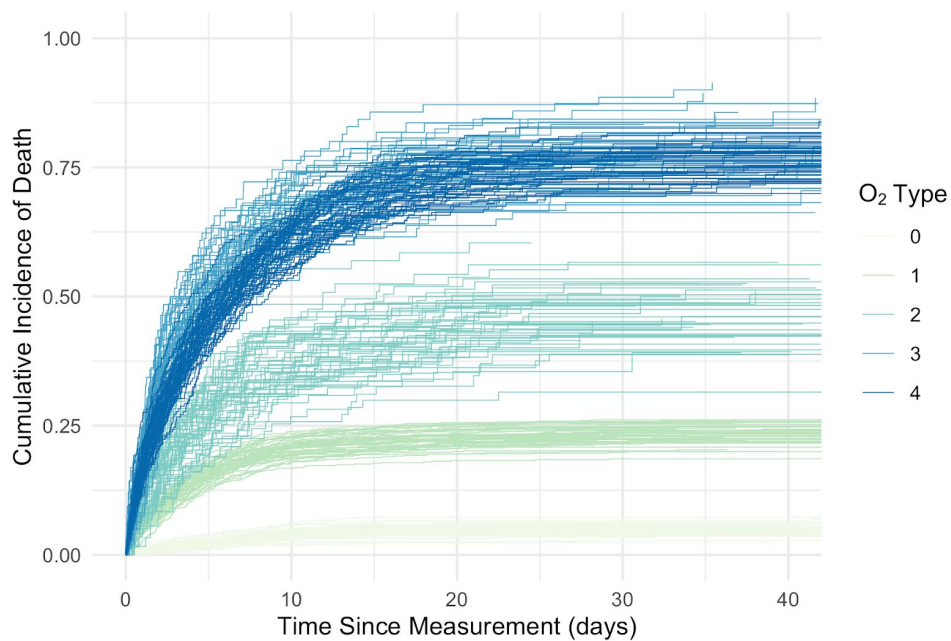

(b) Blood urea nitrogen (BUN)

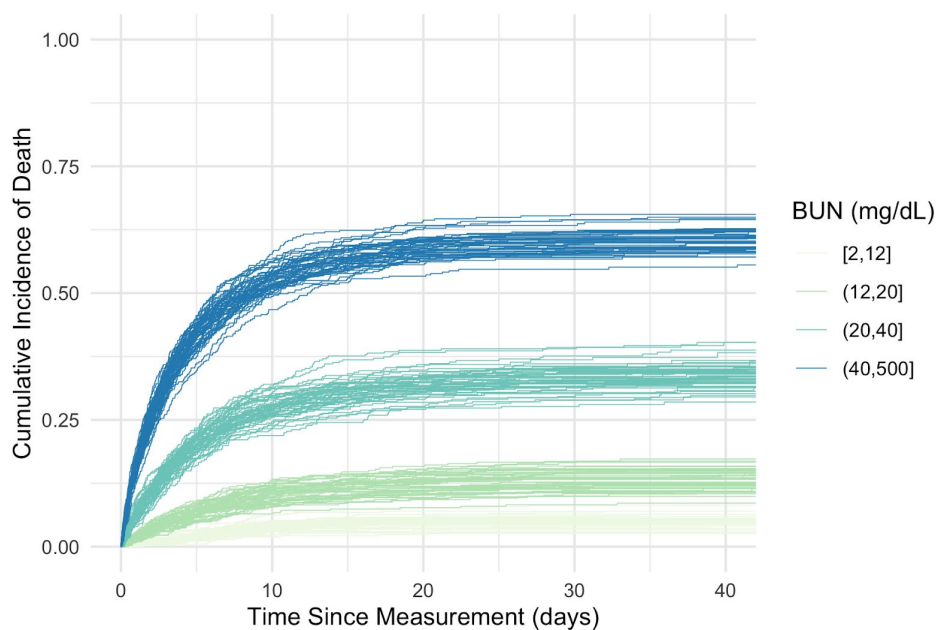

(c) Glasgow Coma Score (integer range: 0-15)

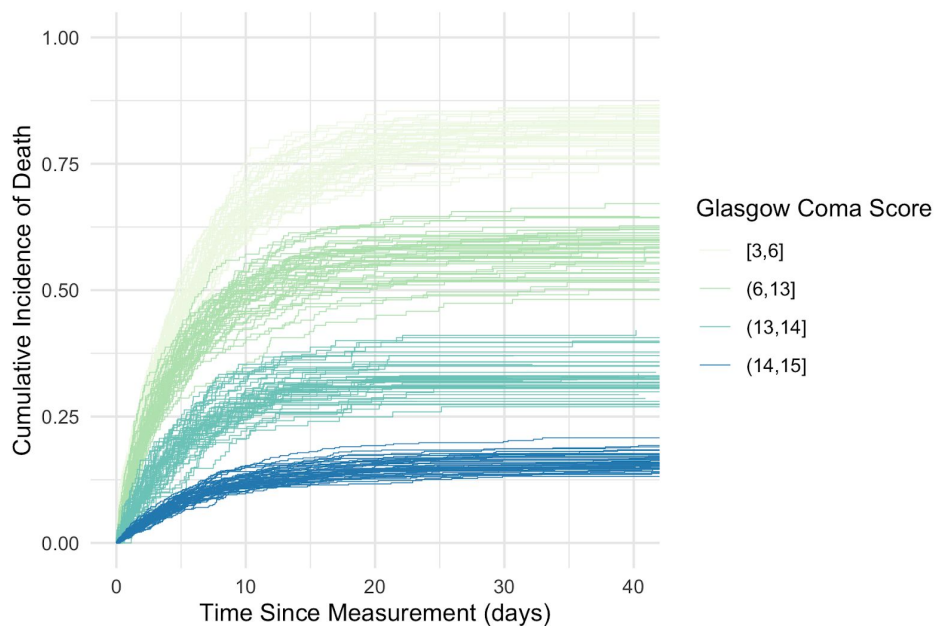

**FIGURE S3: Examples of variables leading to poor cumulative incidence splits.** Splitting by the following variables led to unsatisfactory separation of cumulative incidence of mortality, and none were considered for the final score.

(a) Body Mass Index (BMI)

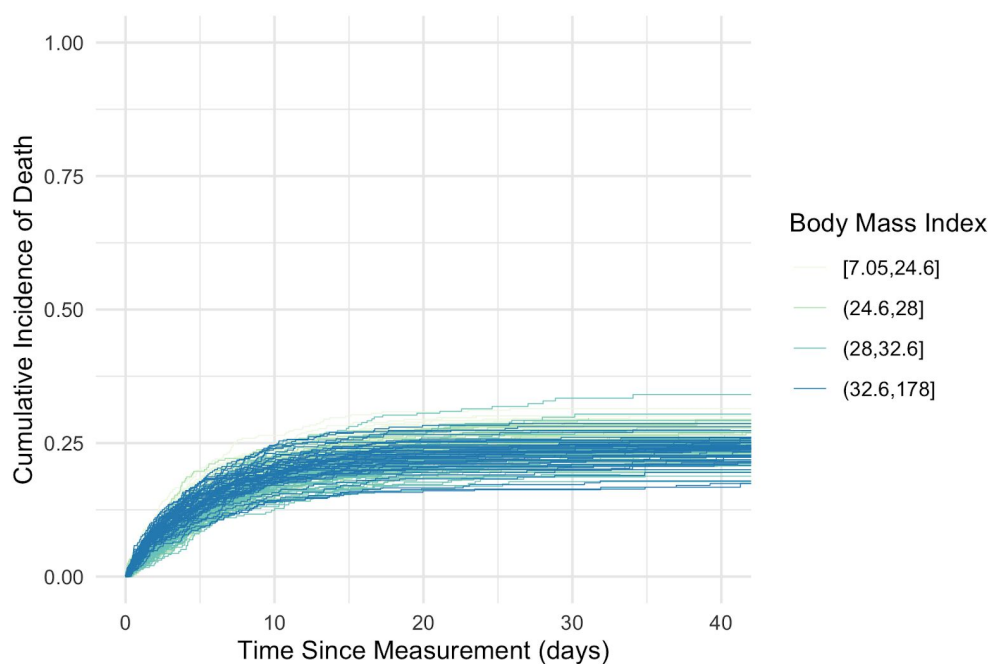

(b) Hispanic status

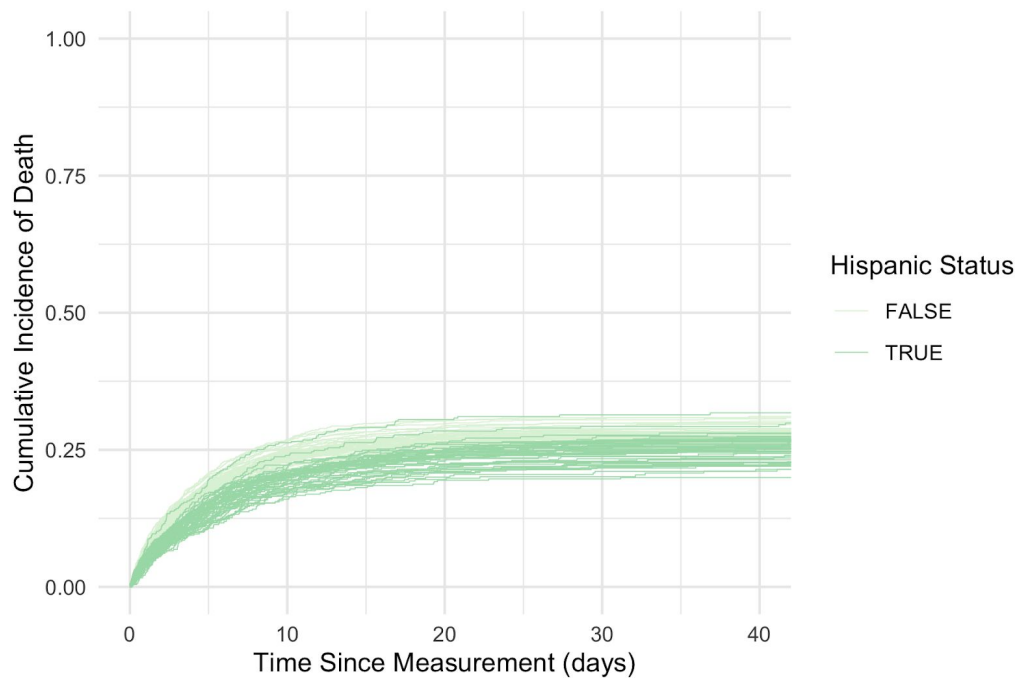

(c) Hemoglobin (g/dL)

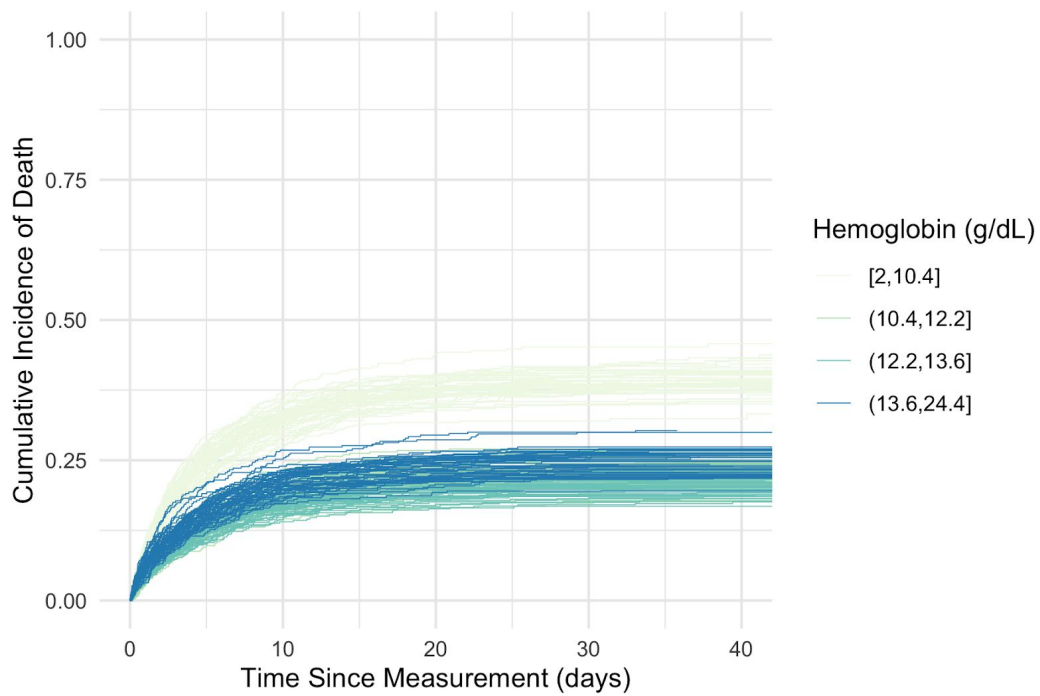

**TABLE S1: Comparison of Datasets 1-3.** For continuous characteristics, p-values were generated using the nonparametric Kruskal-Wallis test. For categorical/binary characteristics, p-values were generated using chi-squared tests.

| <b>Characteristic</b>                   | <b>Dataset 1<br/>(n=1613)</b> | <b>Dataset 2<br/>(n=1613)</b> | <b>Dataset 3<br/>(n=1614)</b> | <b>p-value</b> |
|-----------------------------------------|-------------------------------|-------------------------------|-------------------------------|----------------|
| <b>Age (years) – median (IQR)</b>       | 66.0 (55.2,<br>78.2)          | 66.7 (54.3,<br>77.1)          | 66.7 (55.4,<br>77.5)          | 0.646          |
| <b>Sex – No. (%)</b>                    |                               |                               |                               | 0.116          |
| - Male                                  | 886                           | 943                           | 904                           |                |
| - Female                                | 727                           | 670                           | 710                           |                |
| <b>Race – No. (%)</b>                   |                               |                               |                               | 0.408          |
| - White                                 | 393                           | 397                           | 400                           |                |
| - Black                                 | 441                           | 433                           | 468                           |                |
| - Asian/Pacific Islander                | 70                            | 94                            | 74                            |                |
| - Other                                 | 664                           | 634                           | 621                           |                |
| - Unknown                               | 45                            | 55                            | 51                            |                |
| <b>Ethnicity – No. (%)</b>              |                               |                               |                               | 0.776          |
| - Hispanic                              | 459                           | 440                           | 446                           |                |
| - Non-Hispanic                          | 947                           | 969                           | 945                           |                |
| - Unknown                               | 207                           | 204                           | 223                           |                |
| <b>Hospital of Admission</b>            |                               |                               |                               | 0.066          |
| - Hospital 1 (quaternary care facility) | 635                           | 573                           | 554                           |                |
| - Hospital 2 (community hospital)       | 269                           | 286                           | 266                           |                |
| - Hospital 3 (community hospital)       | 238                           | 264                           | 298                           |                |
| - Hospital 4 (tertiary care facility)   | 179                           | 187                           | 195                           |                |
| - Hospital 5 (community hospital)       | 292                           | 303                           | 301                           |                |
| <b>Insurance Status</b>                 |                               |                               |                               | 0.312          |
| - Medicaid                              | 267                           | 247                           | 237                           |                |
| - Medicare                              | 661                           | 625                           | 662                           |                |
| - Private                               | 356                           | 354                           | 379                           |                |
| - Self-Pay                              | 33                            | 36                            | 40                            |                |
| - Other                                 | 126                           | 143                           | 123                           |                |
| - Unknown                               | 170                           | 208                           | 173                           |                |
| <b>Comorbidities – No. (%)</b>          |                               |                               |                               |                |
| - Hypertension                          | 749                           | 731                           | 752                           | 0.731          |

|                                                  |                   |                   |                   |       |
|--------------------------------------------------|-------------------|-------------------|-------------------|-------|
| - Cardiovascular diseases                        | 717               | 700               | 714               | 0.816 |
| - Coronary artery disease                        | 288               | 253               | 280               | 0.229 |
| - Heart failure                                  | 230               | 231               | 243               | 0.775 |
| - Chronic lung diseases                          | 712               | 718               | 677               | 0.283 |
| - Asthma                                         | 131               | 142               | 146               | 0.626 |
| - COPD/Emphysema                                 | 111               | 105               | 99                | 0.690 |
| - Diabetes mellitus type 2                       | 506               | 492               | 515               | 0.685 |
| - Chronic kidney disease                         | 278               | 271               | 290               | 0.676 |
| - Bleeding or clotting disorder                  | 230               | 227               | 249               | 0.498 |
| - Cerebrovascular disease                        | 204               | 160               | 168               | 0.031 |
| - Cancer                                         | 171               | 173               | 166               | 0.916 |
| - Liver disease                                  | 74                | 85                | 80                | 0.670 |
| - Pregnancy                                      | 49                | 57                | 50                | 0.685 |
| - Prior transplant                               | 42                | 45                | 42                | 0.930 |
| - Human immunodeficiency virus (HIV)             | 32                | 29                | 38                | 0.524 |
| <b>Smoking status – No. (%)</b>                  |                   |                   |                   | 0.767 |
| - Current                                        | 71                | 73                | 70                |       |
| - Former                                         | 338               | 345               | 352               |       |
| - Never                                          | 856               | 846               | 878               |       |
| - Unknown                                        | 348               | 349               | 314               |       |
| <b>Baseline vitals – Median (IQR)</b>            |                   |                   |                   |       |
| - Body mass index (BMI)                          | 28.1 (24.7, 32.6) | 28.2 (24.4, 33.0) | 27.8 (24.6, 32.6) | 0.768 |
| - Diastolic blood pressure (mmHg)                | 73 (65, 82)       | 74 (65, 82)       | 73 (65, 82)       | 0.822 |
| - Systolic blood pressure (mmHg)                 | 128 (114, 144)    | 129 (115, 144)    | 128 (114, 144)    | 0.896 |
| - Glasgow coma score                             | 15 (12, 15)       | 15 (13, 15)       | 15 (12, 15)       | 0.007 |
| - Mean arterial pressure (MAP)                   | 91 (81, 100)      | 90 (81, 99)       | 89 (80, 99)       | 0.069 |
| - Oxygen saturation (%)                          | 95 (92, 98)       | 95 (92, 98)       | 95 (92, 98)       | 0.532 |
| - Heart rate (bpm)                               | 95 (83, 109)      | 95.5 (83, 109)    | 94 (82, 107)      | 0.192 |
| - Respiratory rate                               | 20 (18, 22)       | 20 (18, 22)       | 20 (18, 22)       | 0.088 |
| - Temperature (°F)                               | 98.6 (98.0, 99.9) | 98.6 (98.0, 99.9) | 98.6 (98.0, 99.9) | 0.929 |
| <b>Baseline laboratory values – Median (IQR)</b> |                   |                   |                   |       |

|                                                        |                     |                     |                     |       |
|--------------------------------------------------------|---------------------|---------------------|---------------------|-------|
| - Albumin (g/dL)                                       | 3.2 (2.8, 3.5)      | 3.1 (2.8, 3.5)      | 3.2 (2.8, 3.6)      | 0.113 |
| - Bilirubin (mg/dL)                                    | 0.60 (0.40, 0.80)   | 0.60 (0.40, 0.80)   | 0.60 (0.40, 0.80)   | 0.097 |
| - Blood urea nitrogen (mg/dL)                          | 19.0 (12.0, 34.0)   | 19.0 (12.0, 35.0)   | 19.0 (12.0, 37.0)   | 0.288 |
| - Creatinine (mg/dL)                                   | 1.04 (0.80, 1.60)   | 1.02 (0.80, 1.61)   | 1.05 (0.80, 1.71)   | 0.108 |
| - C reactive protein (mg/L)                            | 114.4 (55.4, 200.1) | 118.6 (57.2, 206.1) | 115.7 (56.3, 204.4) | 0.714 |
| - D-Dimer ( $\mu\text{g/mL}$ )                         | 1.7 (0.9, 3.5)      | 1.6 (0.9, 3.6)      | 1.8 (0.9, 3.5)      | 0.457 |
| - Estimated glomerular filtration rate (EGFR)          | 60 (37,60)          | 60 (37, 60)         | 60 (35, 60)         | 0.100 |
| - Ferritin (ng/mL)                                     | 729 (335, 1730)     | 773 (353, 1931)     | 738 (333, 1722)     | 0.292 |
| - Hemoglobin (g/dL)                                    | 13.2 (11.7, 14.6)   | 13.3 (11.7, 14.5)   | 13.1 (11.6, 14.6)   | 0.830 |
| - Interleukin-6 (IL6; pg/mL)                           | 72.3 (34.5, 135.9)  | 69.1 (32.8, 147.6)  | 70.8 (34.6, 147.8)  | 0.918 |
| - Lactic acid dehydrogenase (LDH; U/L)                 | 426 (318, 574)      | 431 (324, 584)      | 426 (316, 590)      | 0.830 |
| - Lymphocyte percentage (%)                            | 12.3 (7.7, 18.9)    | 11.9 (7.8, 18.0)    | 12.1 (7.8, 18.8)    | 0.631 |
| - PaO <sub>2</sub> (arterial; mmHg)                    | 87.0 (64.0, 134.4)  | 87.8 (63.6, 130.5)  | 87.0 (64.0, 131.2)  | 0.832 |
| - Platelets ( $\times 10^3/\mu\text{L}$ )              | 213 (158, 276)      | 209 (161, 279)      | 213 (160, 282)      | 0.680 |
| - Procalcitonin (ng/mL)                                | 0.20 (0.08, 0.68)   | 0.20 (0.08, 0.61)   | 0.19 (0.08, 0.66)   | 0.866 |
| - Troponin (ng/mL)                                     | 0.02 (0.01, 0.07)   | 0.02 (0.01, 0.06)   | 0.02 (0.01, 0.07)   | 0.074 |
| - White blood cell count ( $\times 10^3/\mu\text{L}$ ) | 7.7 (5.6, 10.7)     | 7.5 (5.6, 10.6)     | 7.7 (5.7, 10.7)     | 0.493 |
| <b>Baseline risk scores – Median (IQR)</b>             |                     |                     |                     |       |
| - SOFA                                                 | 1 (0, 3)            | 1 (0, 3)            | 1 (0, 4)            | 0.240 |
| - qSOFA                                                | 0 (0, 1)            | 0 (0, 1)            | 0 (0, 1)            | 0.974 |
| - CURB-65                                              | 1 (0, 2)            | 1 (0, 2)            | 1 (1, 2)            | 0.463 |
| <b>Baseline oxygen requirement</b>                     |                     |                     |                     |       |
| - Room air                                             | 690                 | 660                 | 679                 | 0.215 |
| - Low flow / non-rebreather                            | 738                 | 776                 | 734                 |       |

|                                                       |    |    |    |  |
|-------------------------------------------------------|----|----|----|--|
| - High flow O2                                        | 14 | 29 | 31 |  |
| - Non-invasive ventilation (NIV)<br>(e.g. CPAP/BiPAP) | 66 | 68 | 66 |  |
| - Invasive mechanical ventilation<br>(IMV)            | 84 | 68 | 66 |  |
| - NA / No record                                      | 21 | 12 | 28 |  |
